# Supplementary figures and images for: Classification of lung adenocarcinoma based on stemness scores in bulk and single cell transcriptomes
Source: PubMed Central journal article supplement — Comput Struct Biotechnol J. 2022 Apr 6;20:1691–701. doi: 10.1016/j.csbj.2022.04.004 (PMC9018126; doi:10.1016/j.csbj.2022.04.004), 2022-04-06

Fig. S1

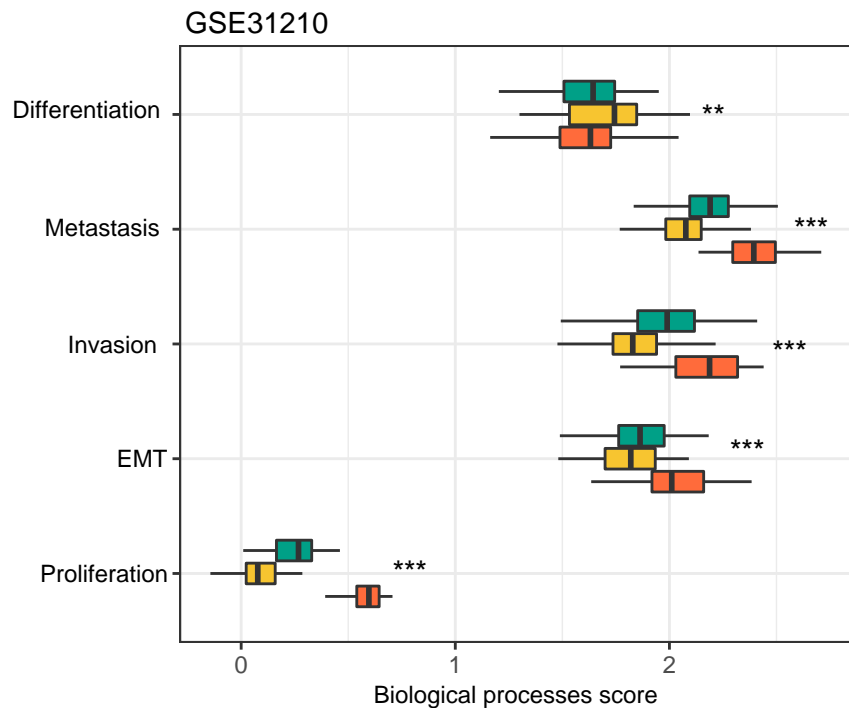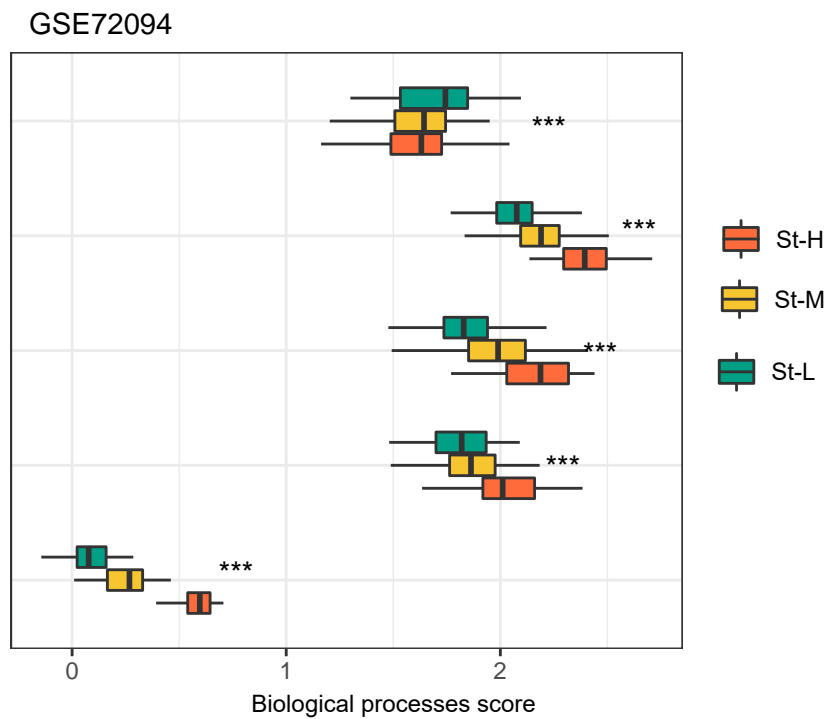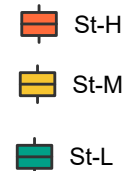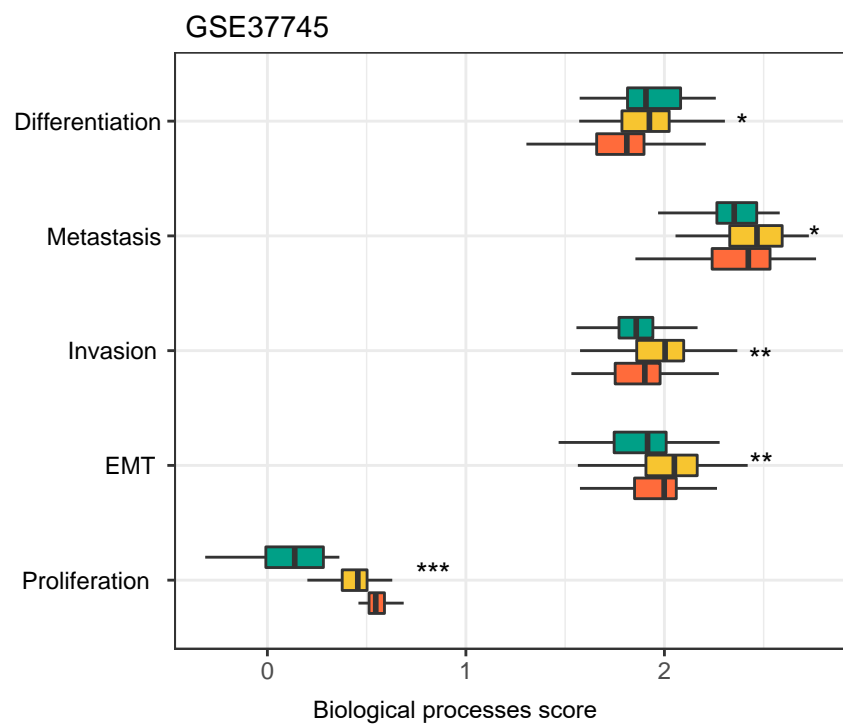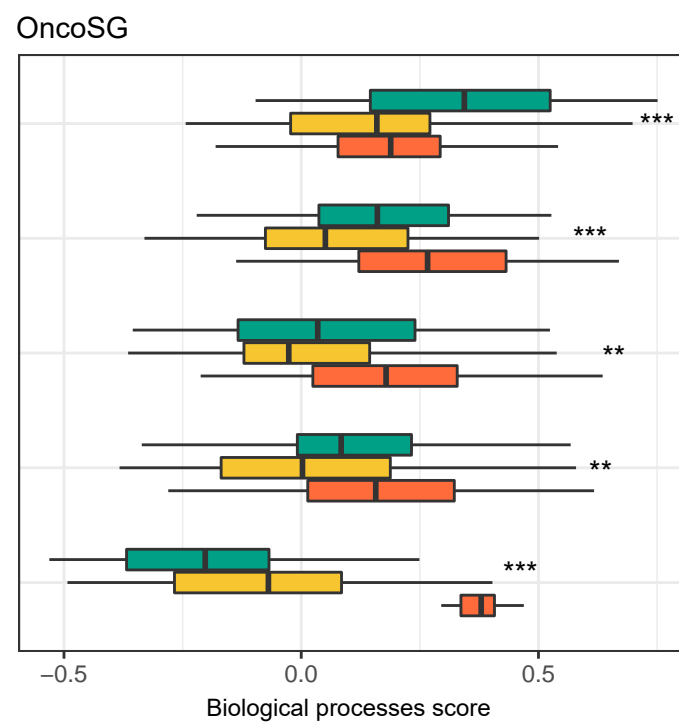

Supplement: mmc1.pdf [file mmc1.pdf]

Fig. S2

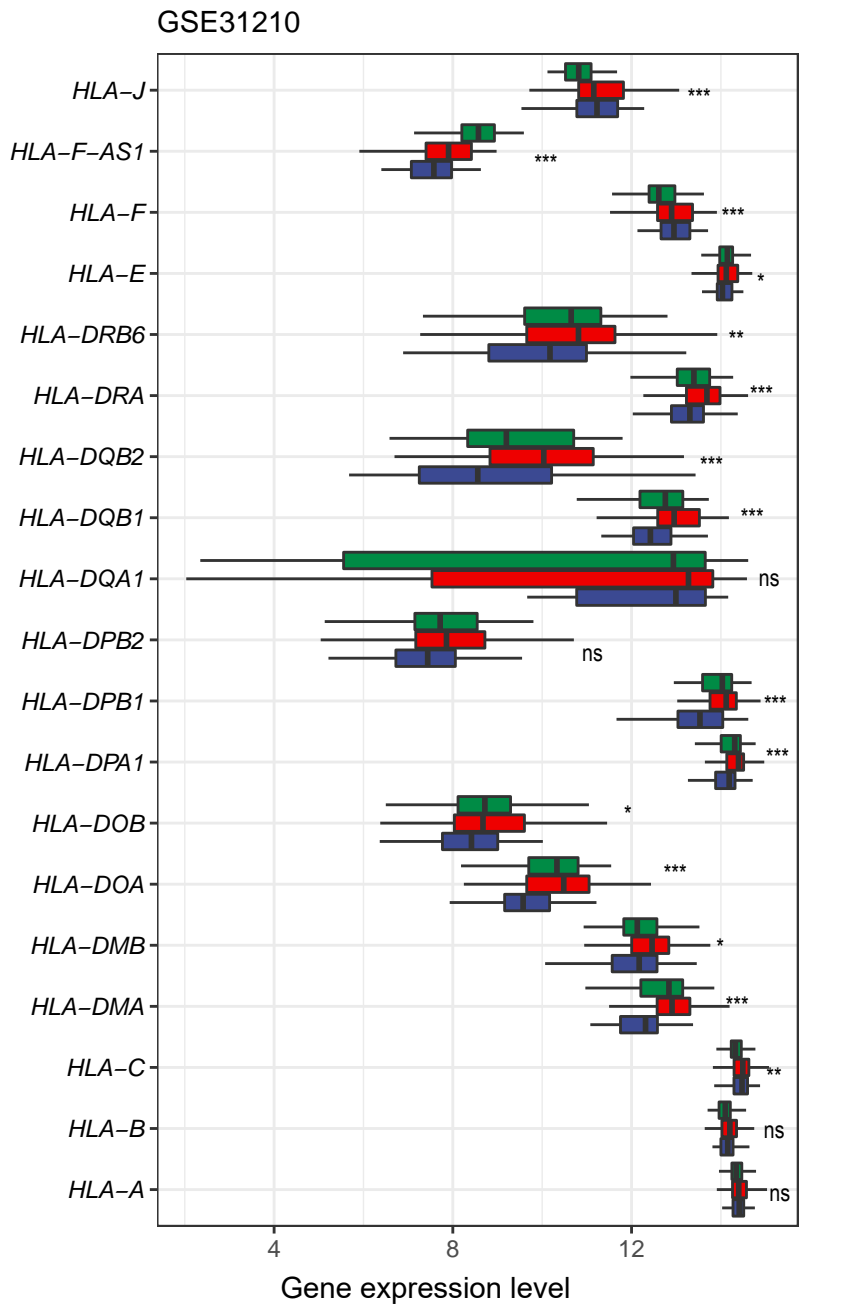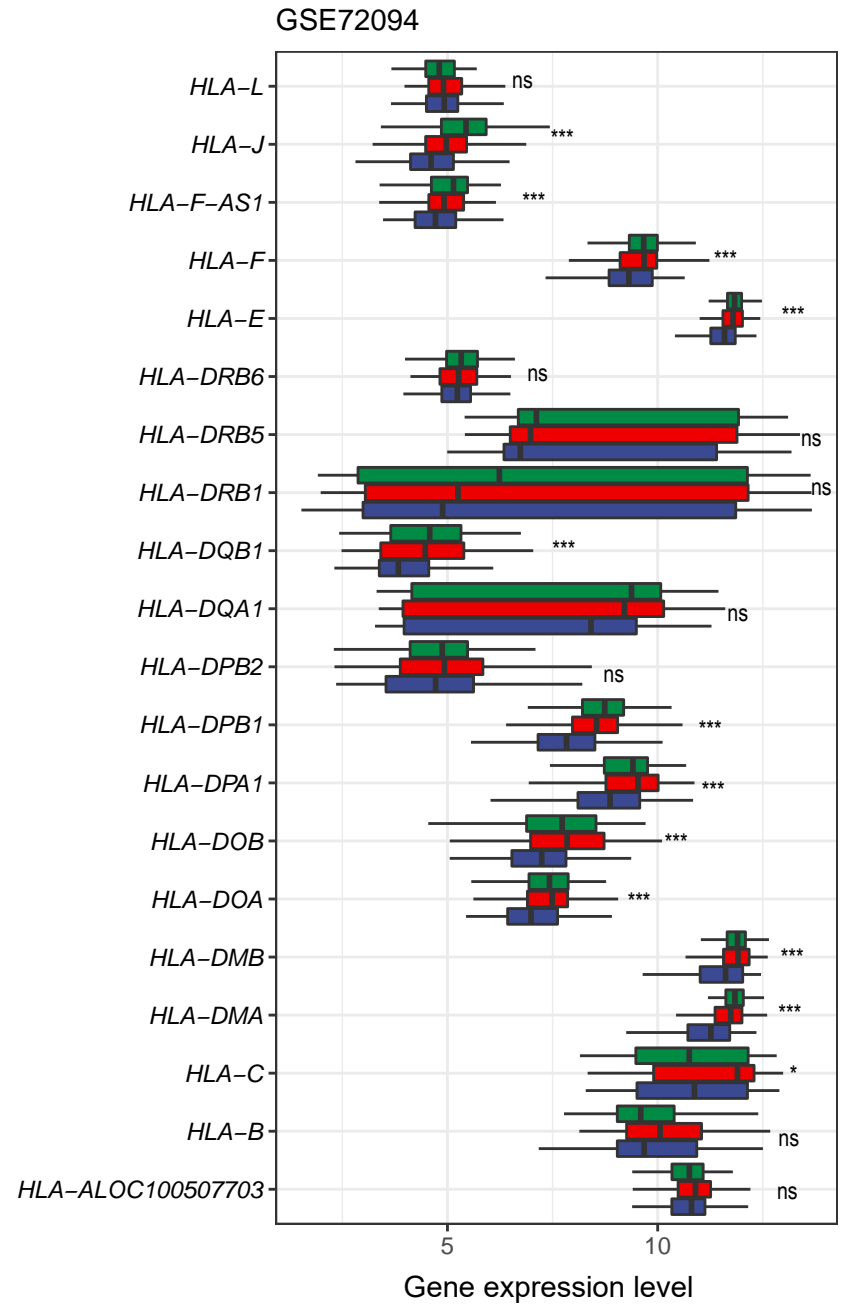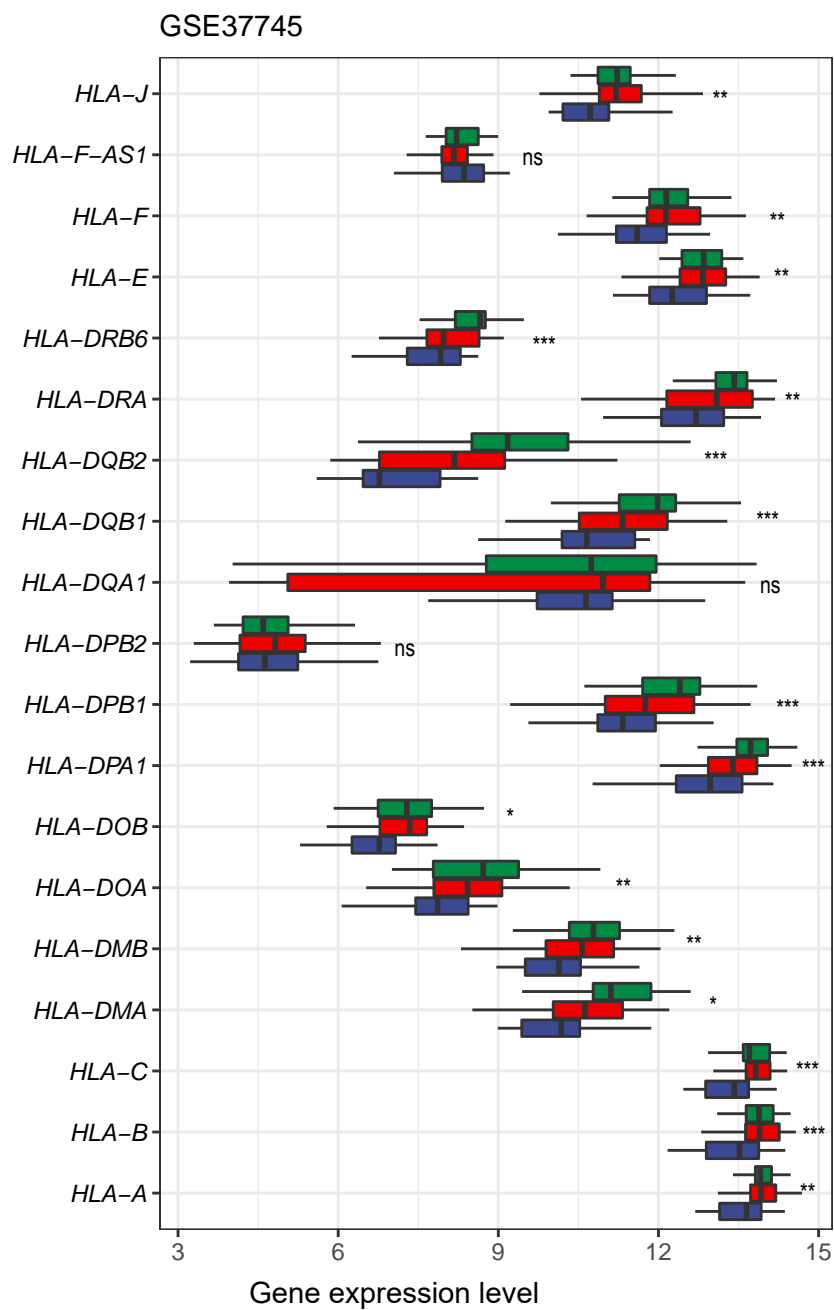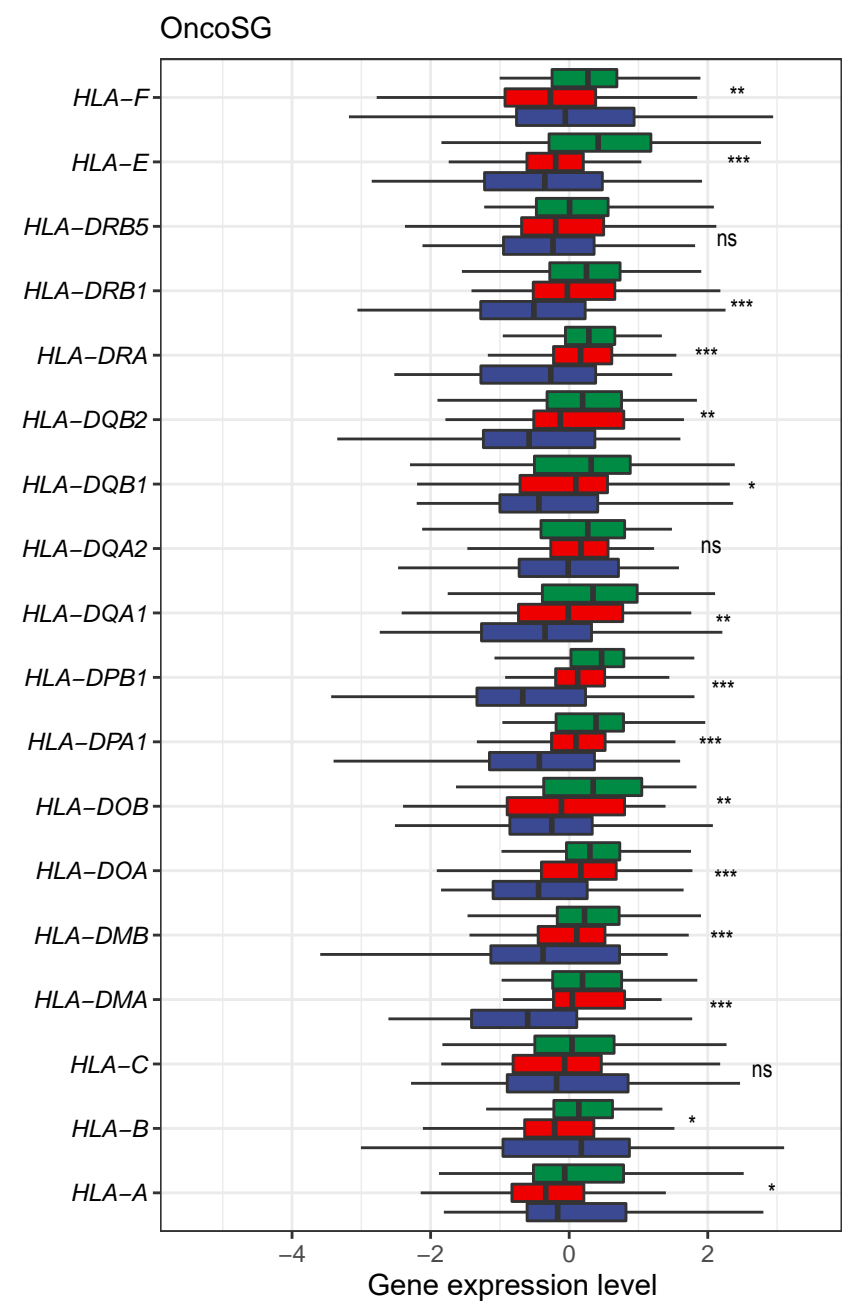

St-H St-M St-L

Supplement: mmc2.pdf [file mmc2.pdf]
